# Supplementary material for: On/off switchable physical stimuli regulate the future direction of adherent cellular fate
Source: Royal Society of Chemistry journal article supplement (doi:10.1039/d1tb00908g), 2021-01-01
Supplement: d1tb00908g1.pdf [file d1tb00908g1.pdf]

## Supporting Information

### **On / off switchable physical stimuli regulate the future direction of adherent cells**

*Indong Jun, Hyung-Seop Han, Jae Won Lee, Kyungwoo Lee, Yu-Chan Kim, Myoung-Ryul Ok, Hyun-Kwang Seok, Young Jun Kim, In-Seok Song, Heungsoo Shin, James R Edwards, Kuen Yong Lee and Hojeong Jeon<sup>b\*</sup>*

### Supplementary Figures:

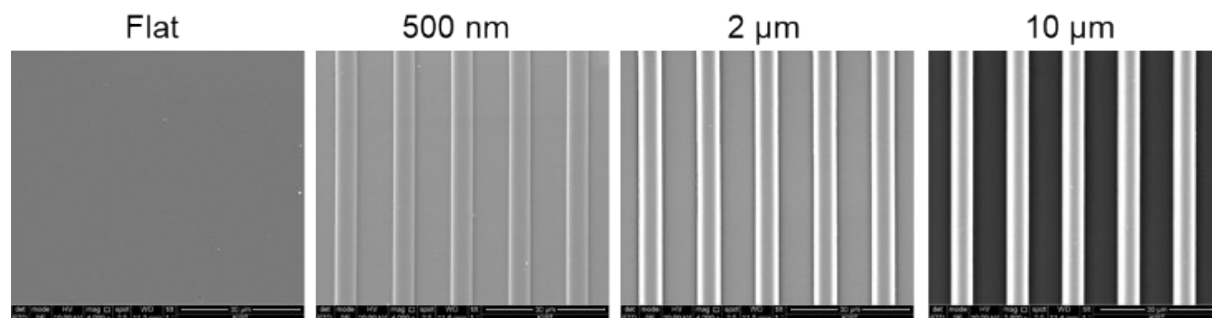

**Figure S1.** SEM images of micro-patterned PDMS masters and their associated groove depths (500 nm, 2  $\mu\text{m}$ , and 10  $\mu\text{m}$ ).

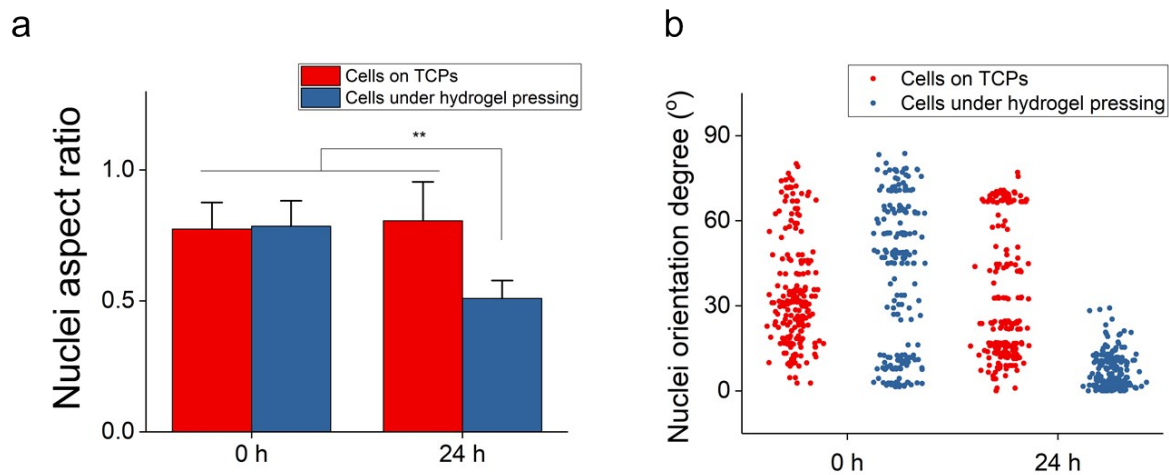

**Figure S2.** a) Quantification of the nuclei aspect ratio and b) distribution of the nuclei-orientation angle for C2C12 myoblasts cultured on TCP during on/off switchable stimuli treatment with cell-interactive alginate hydrogels for 24 h. \*\* $p < 0.05$ .

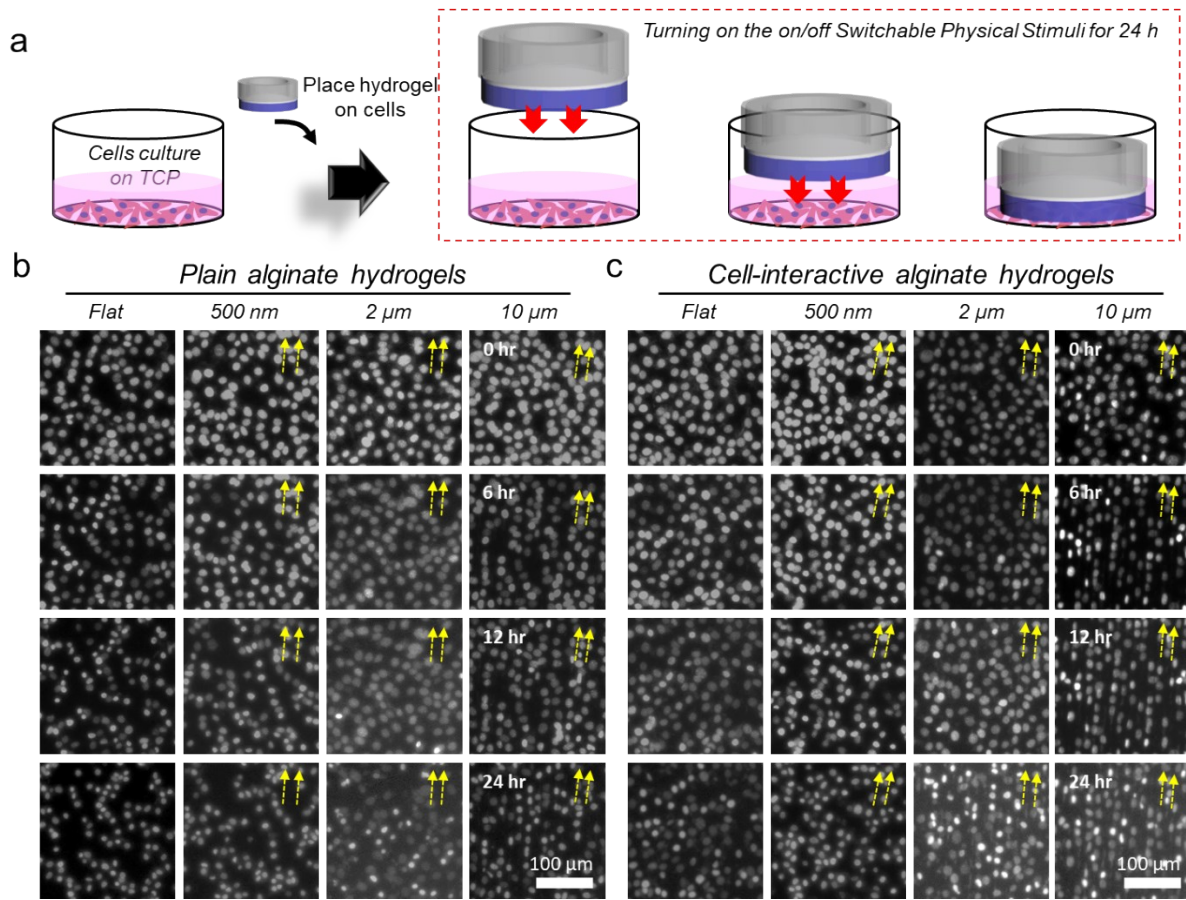

**Figure S3.** a) Schematic illustration of the on/off switchable stimuli technique, the relevance of the cell and nuclei shape, depends on the duration of the alginate hydrogels in contact with the adherent cell on TCP. Time-lapse microscopy of nuclei during on/off switchable stimuli treatment with b) plain alginate hydrogels and c) Cell-interactive alginate hydrogels for 24 h. The direction of the underlying patterns of hydrogels is indicated by yellow dashed arrows.

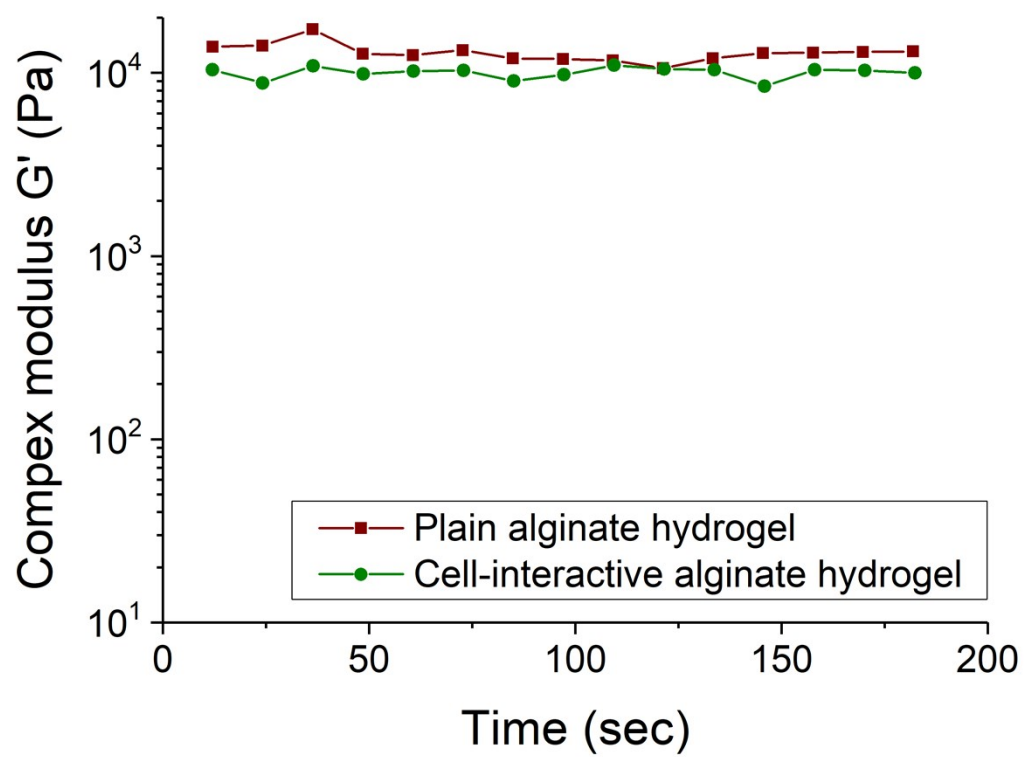

**Figure S4.** Complex modulus of alginate hydrogels using rheological measurements

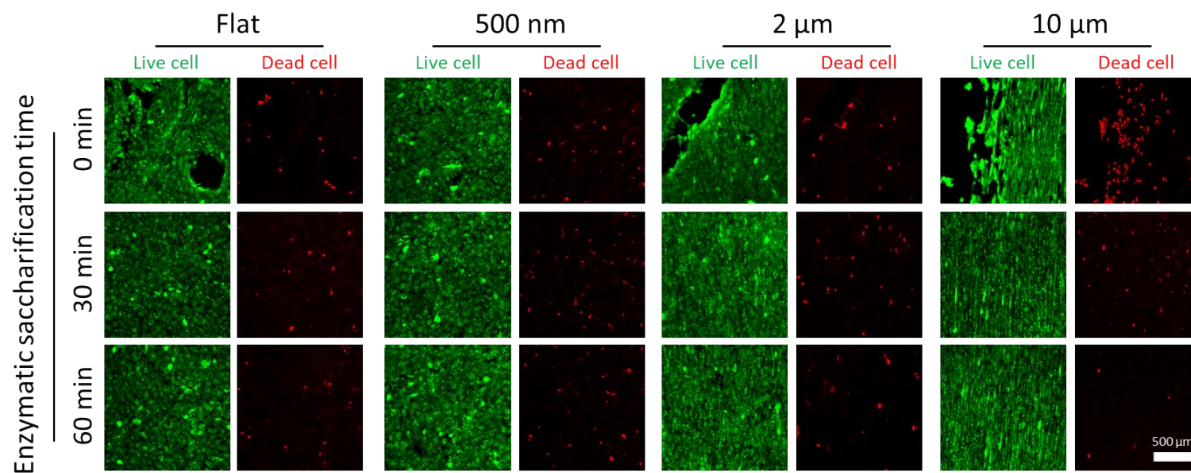

**Figure S5.** The survival rate of on/off switchable stimuli-mediated cells on TCP according to the removal treatment time of the plain alginate hydrogels used in the on/off switchable stimuli technique Live/Dead staining of on/off switchable stimuli-mediated adherent cells according to the different enzymatic saccharification time (0 – 60 min). The direction of the underlying patterns of hydrogels is indicated by yellow dashed arrows.

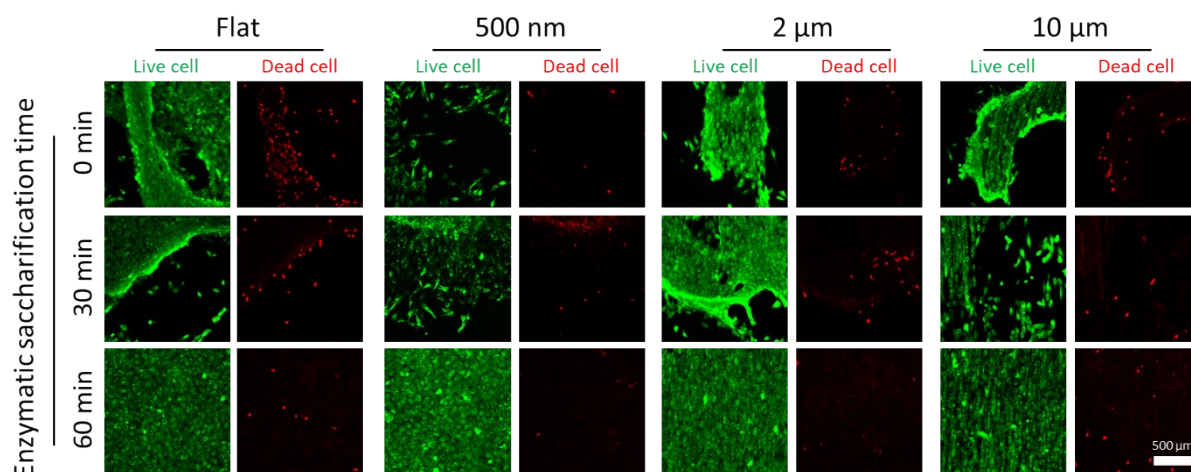

**Figure S6.** The survival rate of on/off switchable stimuli-mediated cells on TCP according to the removal treatment time of the cell-interactive alginate hydrogels used in the on/off switchable stimuli technique Live/Dead staining of on/off switchable stimuli-mediated adherent cells according to the different enzymatic saccharification time (0 – 60 min). The direction of the underlying patterns of hydrogels is indicated by yellow dashed arrows.

## **Supplementary movie**

Movie S1 Real-time observation of cells cultured on TCP.

Movie S2 Real-time observation of cells cultured on TCP during on/off switchable stimuli treatment with cell-interactive alginate hydrogels for 24 h

Movie S3 Real-time observation of the nuclei of cells cultured on TCP.

Movie S4 Real-time observation of the nuclei of cells cultured on TCP during on/off switchable stimuli treatment with cell-interactive alginate hydrogels for 24 h
